# Supplementary material for: Electronically modulated nickel boron by CeOx doping as a highly efficient electrocatalyst towards overall water splitting
Source: Royal Society of Chemistry journal article supplement (doi:10.1039/d1dt03278j), 2021-12-15
Supplement: d1dt03278j1.pdf [file d1dt03278j1.pdf]

## Supplementary Information

### **Electronically Modulated Nickel Boron by CeO<sub>x</sub> Doping as a Highly Efficient Electrocatalyst toward Overall Water Splitting**

Huimin Wang,<sup>a</sup> Huixiang Liu,<sup>b</sup> Tao Feng,<sup>a</sup> Lincai Wang,<sup>\*a</sup> Wenyi Yuan,<sup>a</sup> Qing Huang<sup>a</sup> and Yanhui Guo<sup>\*b</sup>

a. Shanghai Collaborative Innovation Centre for WEEE Recycling, Shanghai Polytechnic University, Shanghai, 201209, P.R. China.

b. Department of Materials Science, Fudan University, Shanghai, 200433, P.R. China.

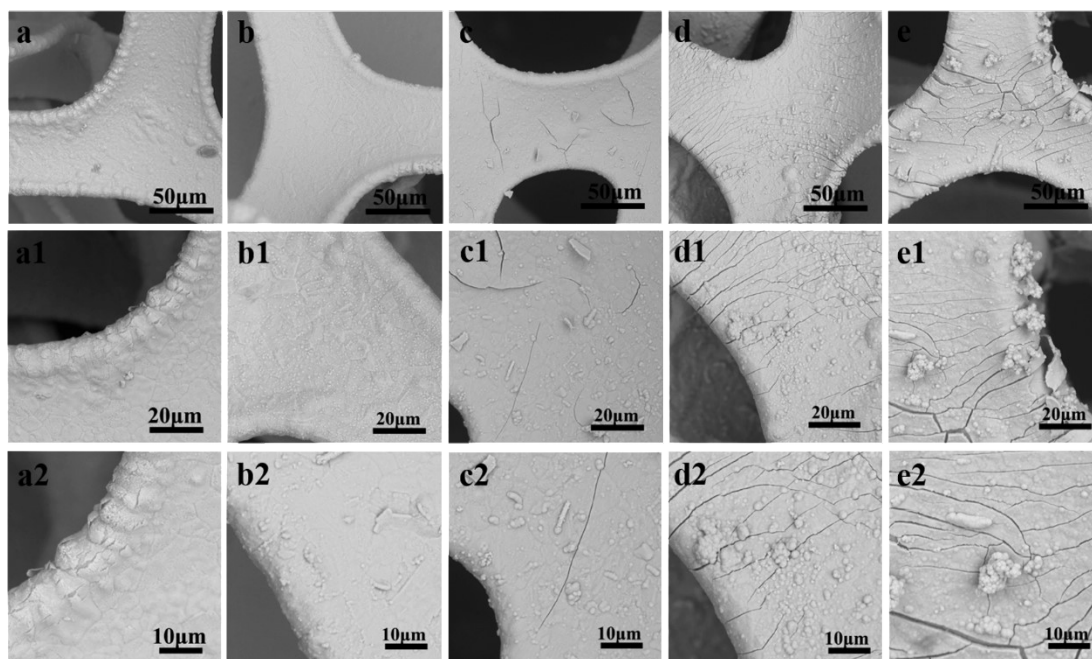

Fig. S1 SEM images of  $\text{CeO}_x\text{-NiB@NF}$  after electroless plating at 30 °C for (a) 30 min; (b) 60 min; (c) 90 min; (d) 120 min and (e) 150 min.

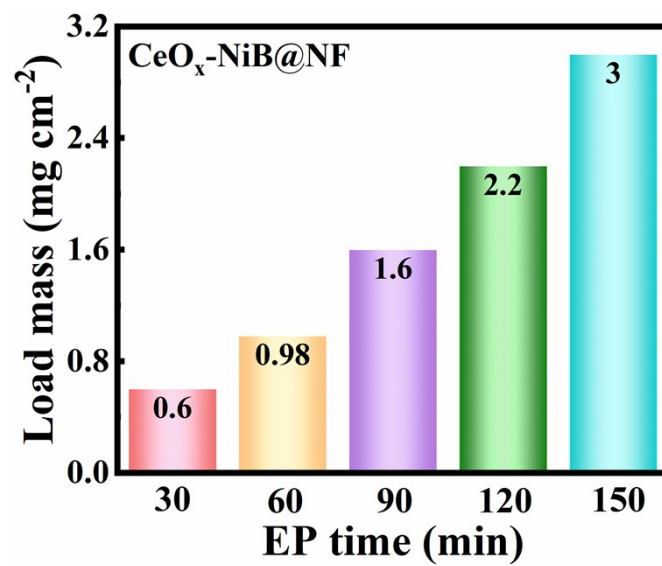

Fig. S2 Loading mass of CeO<sub>x</sub>-NiB@NF at different EP times.

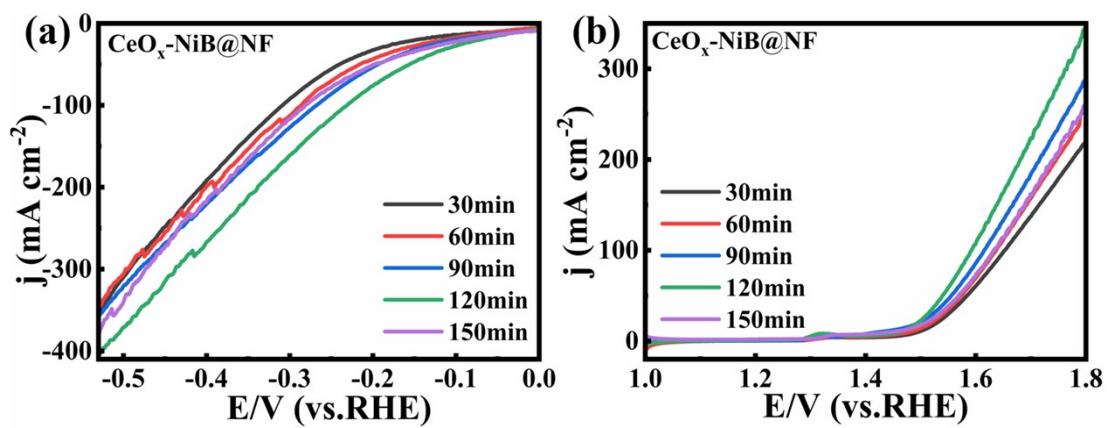

Fig. S3. (a)-(b) LSV curves for HER and OER of  $\text{CeO}_x\text{-NiB@NF}$  at different EP times.

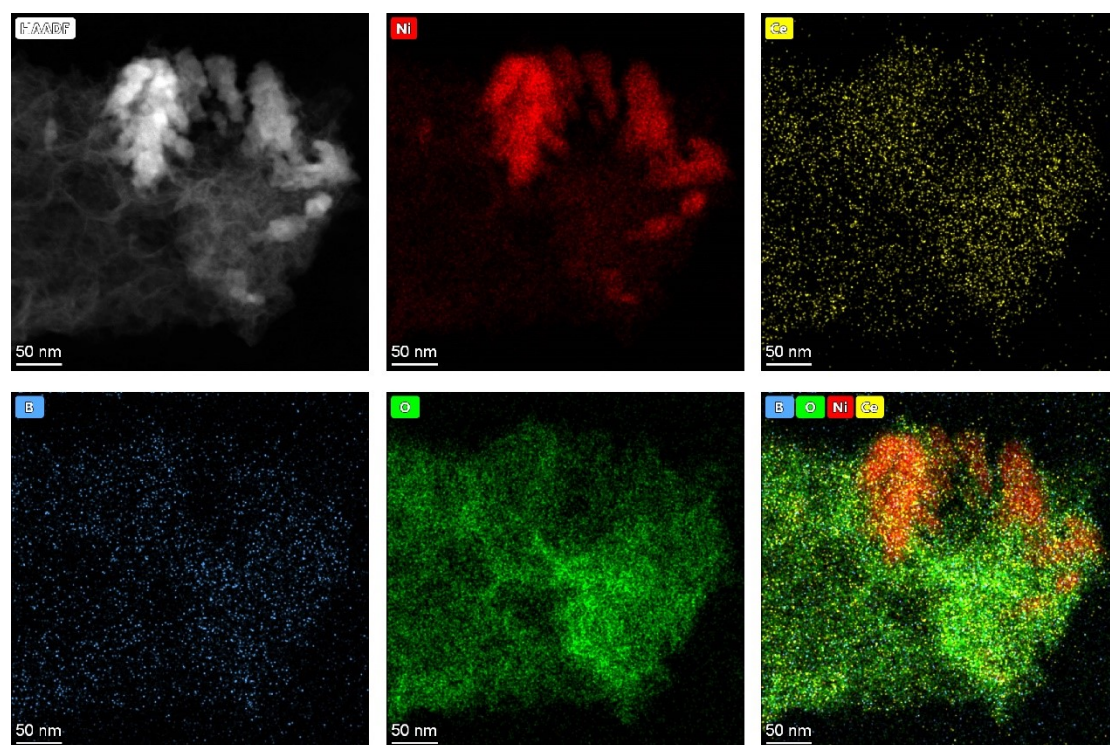

Fig. S4 HAADF image and corresponding elemental mapping images of Ni, Ce, B and O of  $\text{CeO}_x\text{-NiB}$  peeled from  $\text{CeO}_x\text{-NiB@NF}$ .

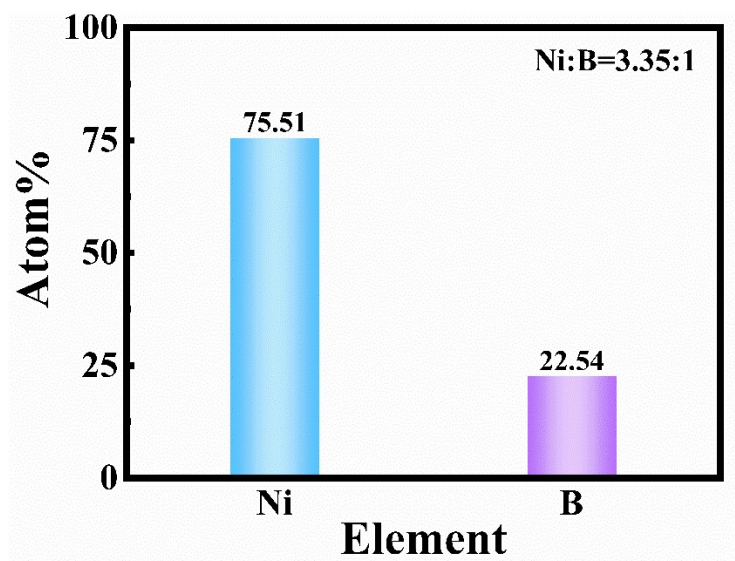

Fig. S5 Atom% of Ni and B in Ni-B@NF sample.

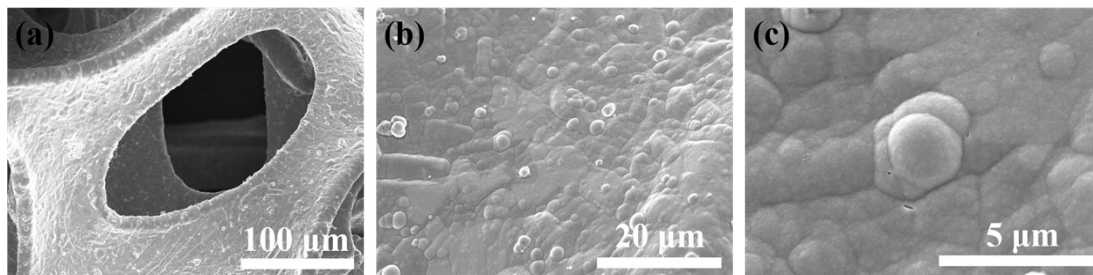

Fig. S6 FESEM images of Ni-B@NF.

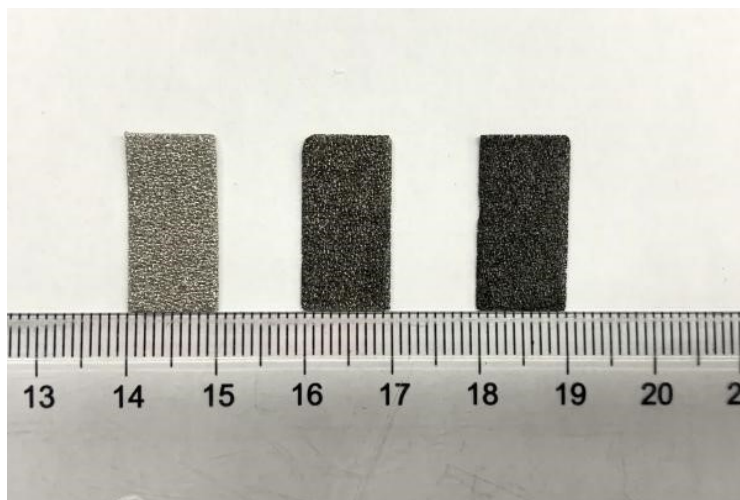

Fig. S7 Optical photos of NF, Ni-B@NF and CeO<sub>x</sub>-NiB@NF.



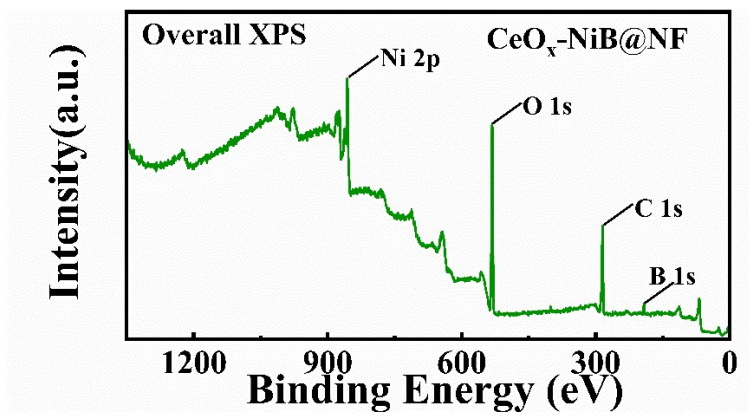

Fig. S8 Overall XPS spectra of CeO<sub>x</sub>-NiB@NF.

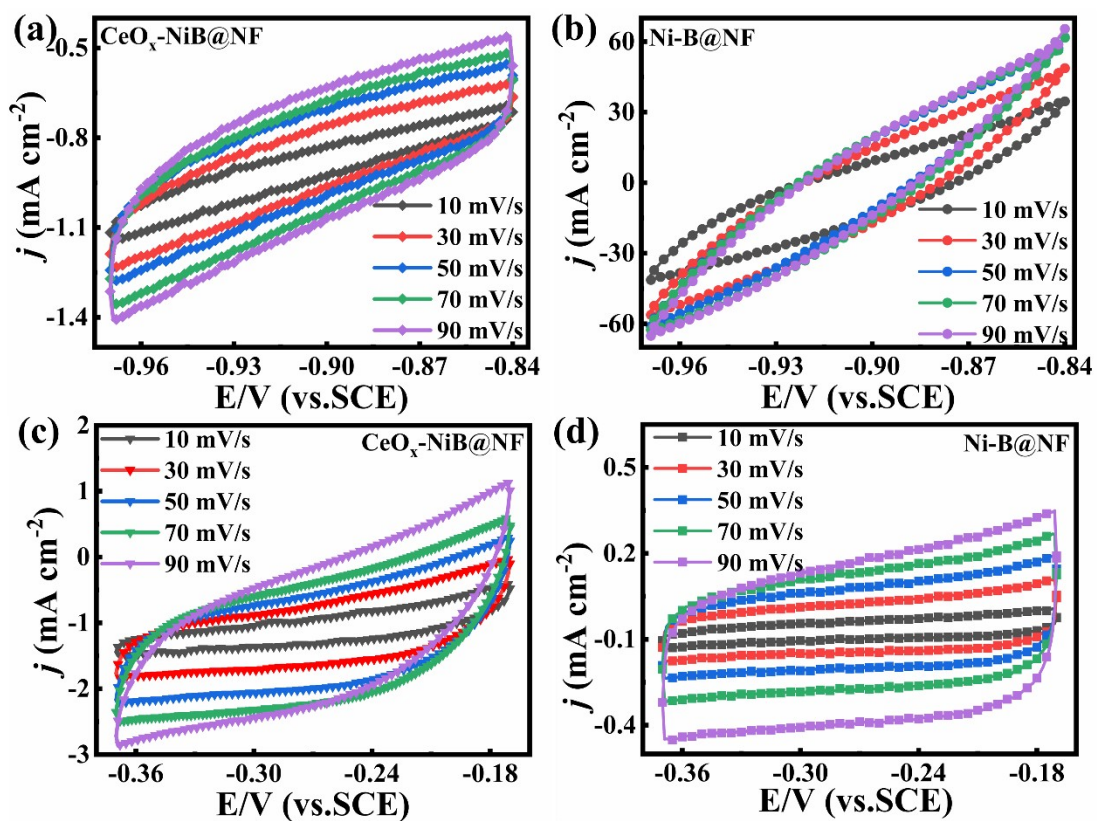

Fig. S9. (a-b) Cyclic voltammograms of Ni-B@NF and CeO<sub>x</sub>-NiB@NF electrodes at different scan rates in 1.0 M KOH for HER; (c-d) Cyclic voltammograms of Ni-B@NF and CeO<sub>x</sub>-NiB@NF electrode at different scan rates in 1.0 M KOH for OER.

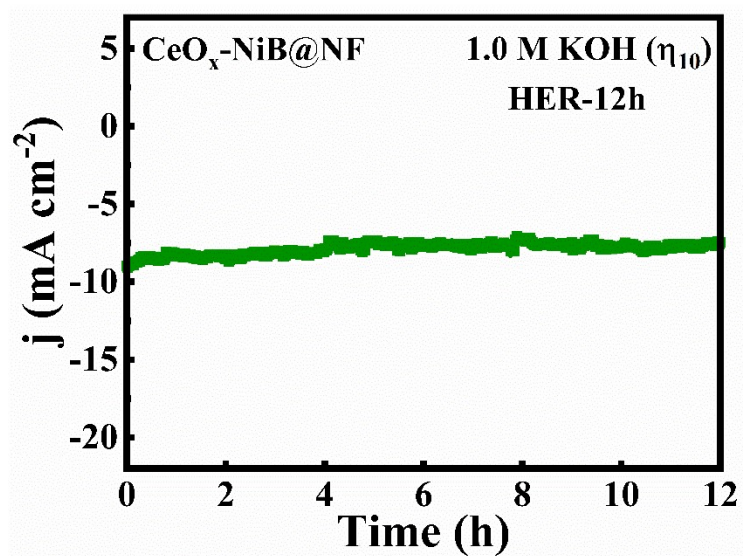

Fig. S10 Chronoamperometry measurements of long-term stability of CeO<sub>x</sub>-NiB@NF at around 10 mA·cm<sup>-2</sup> for 12 h.

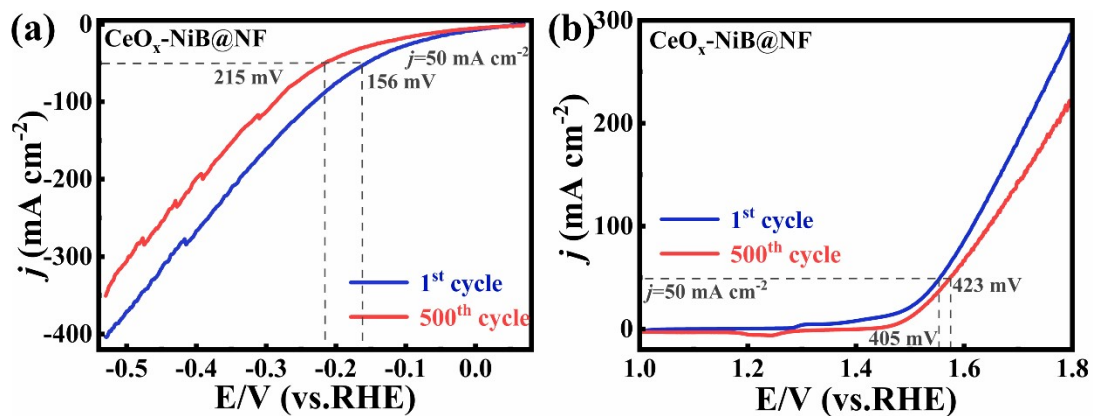

Fig. S11. (a) LSV curves for  $\text{CeO}_x\text{-NiB@NF}$  electrode toward HER before and after 500 continuous CV scan cycles; (b) LSV curves for  $\text{CeO}_x\text{-NiB@NF}$  electrode toward OER before and after 500 continuous CV scan cycles.

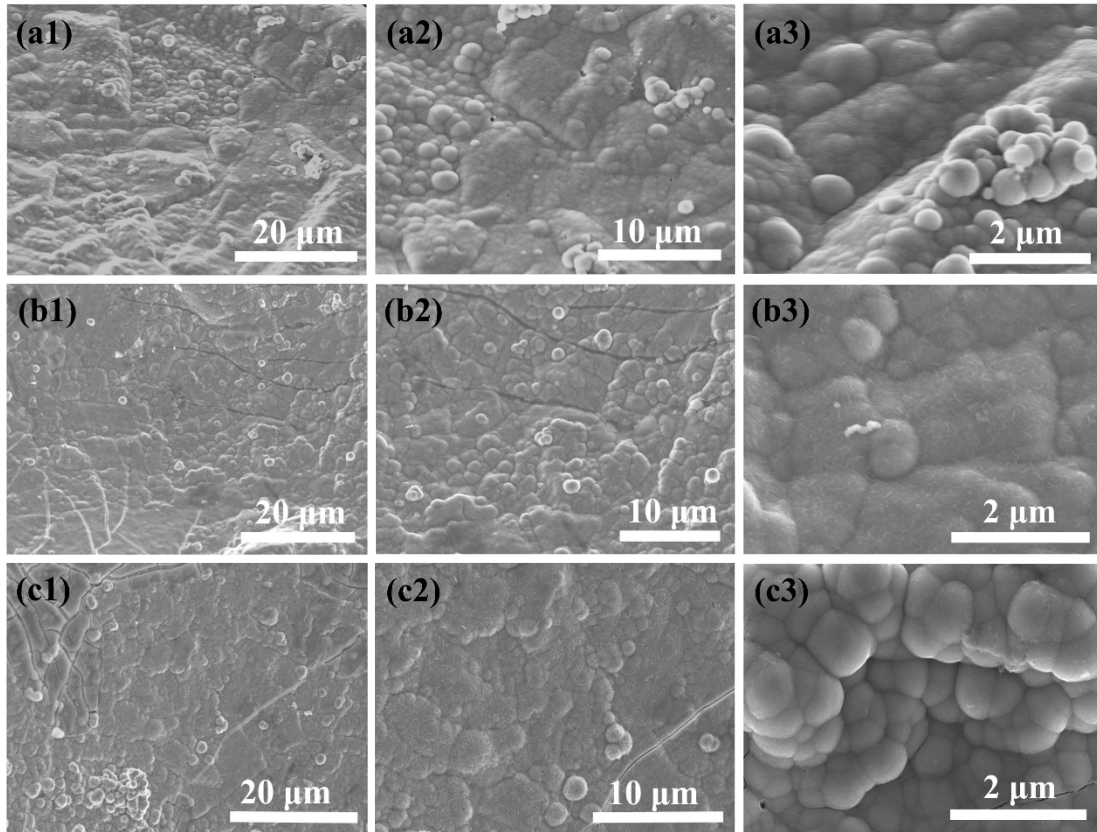

Fig. S12. (a-c) The FESEM images of original, post-HER and post-OER  $\text{CeO}_x\text{-NiB@NF}$  electrode.

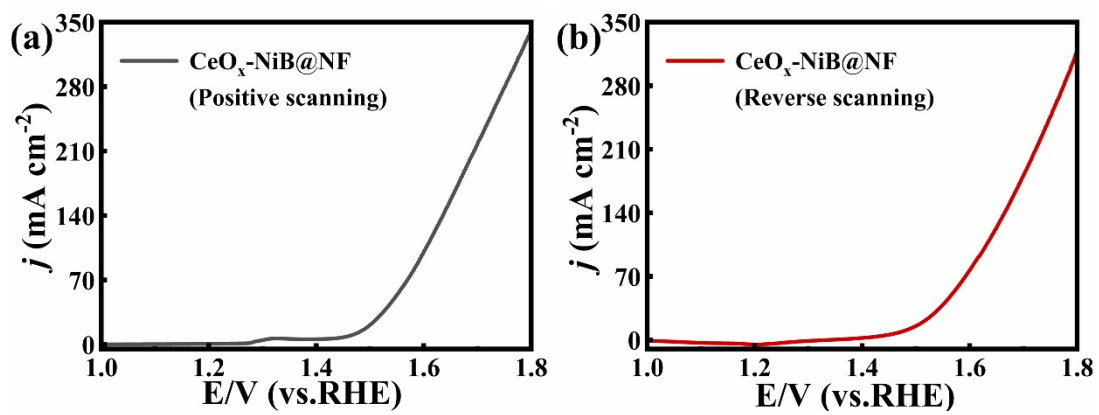

Fig. S13. (a)-(b) LSV curves for OER of CeO<sub>x</sub>-NiB@NF at different scanning directions.

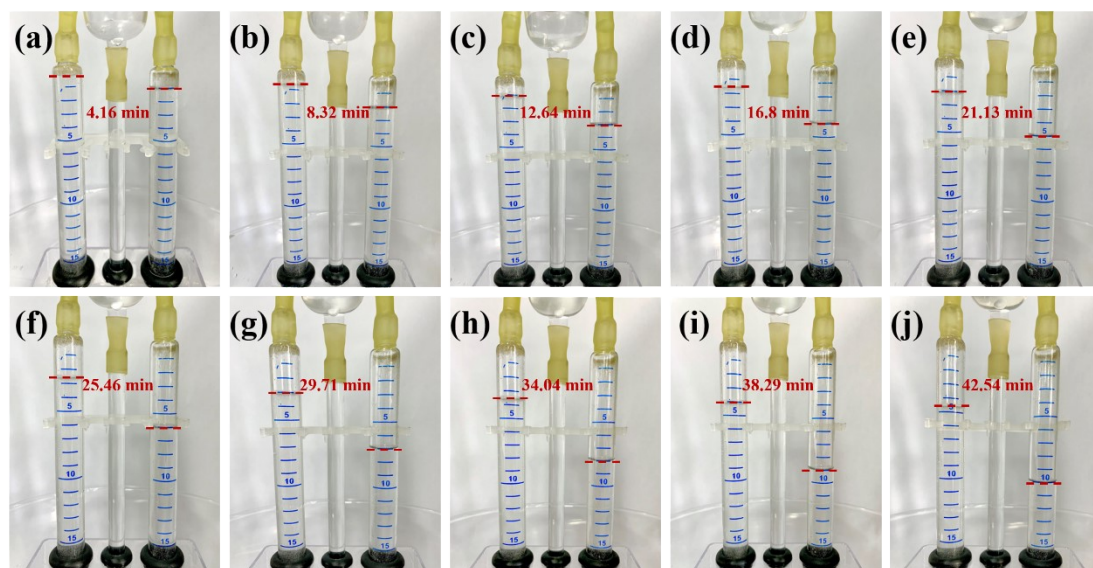

Fig. S14 Intuitive diagram of the amount of  $H_2$  and  $O_2$  produced over time of  $CeO_x-NiB@NF$ .

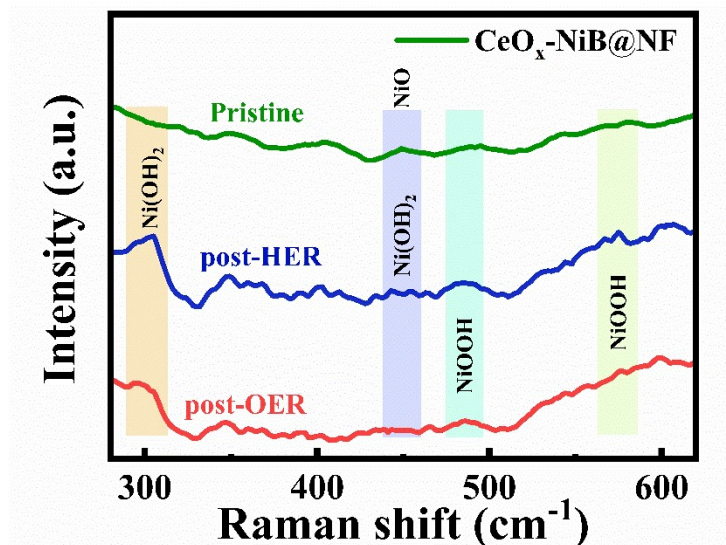

Fig. S15 Raman spectrum with 532 nm excitation before and after HER or OER cycles.



---

Table S1 Atom% of Ni, Ce and B in CeO<sub>x</sub>-NiB@NF sample.

---

| Elements    | Ni   | Ce    | B   | Ni:Ce:B     |
|-------------|------|-------|-----|-------------|
| EDS results | 37.9 | 0.51  | 4.2 | 9.02:0.12:1 |
| ICP results | 25   | 0.437 | 3.2 | 7.8:0.136:1 |

---

Table S2 Comparison of the HER catalytic performance of CeO<sub>x</sub>-NiB@NF and other electrocatalyst electrodes in 1.0 M KOH.

| Catalysts                                             | Electrolyte | j (mA·cm <sup>-2</sup> ) | Potential (mV) | Reference |
|-------------------------------------------------------|-------------|--------------------------|----------------|-----------|
| CeO <sub>x</sub> -NiB@NF                              | 1M KOH      | 10                       | 19             | This work |
| CoP/EEBP                                              | 1M KOH      | 10                       | 118            | 1         |
| FeNi/PNG                                              | 1M KOH      | 10                       | 132            | 2         |
| Ni <sub>x</sub> Fe <sub>1-x</sub> B                   | 1M KOH      | 10                       | 63.5           | 3         |
| hcp-Co@NC                                             | 1M KOH      | 10                       | 90             | 4         |
| CoP-5                                                 | 1M KOH      | 10                       | 21.1           | 5         |
| FeOOH/Ni <sub>3</sub> N                               | 1M KOH      | 10                       | 67             | 6         |
| N-NiVFeP/ NF                                          | 1M KOH      | 10                       | 79             | 7         |
| U-Fe-β-Ni(OH) <sub>2</sub> /NF                        | 1M KOH      | 10                       | 121            | 8         |
| NiMoS                                                 | 1M KOH      | 10                       | 78             | 9         |
| NiTe@RuO <sub>2</sub>                                 | 1M KOH      | 10                       | 19             | 10        |
| NiRu@C                                                | 1M KOH      | 10                       | 33             | 11        |
| Fe-Ni <sub>3</sub> S <sub>2</sub> @ FeNi <sub>3</sub> | 1M KOH      | 10                       | 105            | 12        |
| Co/N-CNT/VN                                           | 1M KOH      | 10                       | 63.4           | 13        |
| RuCo@CDs                                              | 1M KOH      | 10                       | 11             | 14        |
| Co <sub>4</sub> N-CeO <sub>2</sub> /GP                | 1M KOH      | 10                       | 24             | 15        |
| Rh SAC-CuO NAs/CF                                     | 1M KOH      | 10                       | 44             | 16        |
| Co <sub>5</sub> Mo <sub>10</sub> S <sub>x</sub> /CC   | 1M KOH      | 10                       | 36             | 17        |
| MP-MO <sub>x</sub>                                    | 1M KOH      | 10                       | 26             | 18        |
| Ir-NiCo LDH                                           | 1M KOH      | 10                       | 21             | 19        |

Table S3 Comparison of the OER catalytic performance of CeO<sub>x</sub>-NiB@NF and other electrocatalyst electrodes in 1.0 M KOH.

| Catalysts                                             | Electrolyte | j (mA·cm <sup>-2</sup> ) | Potential (mV) | Reference |
|-------------------------------------------------------|-------------|--------------------------|----------------|-----------|
| CeO <sub>x</sub> -NiB@NF                              | 1M KOH      | 10                       | 274            | This work |
| CoP/EEBP                                              | 1M KOH      | 10                       | 335            | 1         |
| FeNi/PNG                                              | 1M KOH      | 10                       | 353            | 2         |
| Ni <sub>x</sub> Fe <sub>1-x</sub> B                   | 1M KOH      | 10                       | 282            | 3         |
| hcp-Co@NC                                             | 1M KOH      | 10                       | 290            | 4         |
| CoP-5                                                 | 1M KOH      | 10                       | 320            | 5         |
| FeOOH/Ni <sub>3</sub> N                               | 1M KOH      | 10                       | 244            | 6         |
| N-NiVFeP/ NF                                          | 1M KOH      | 10                       | 229            | 7         |
| U-Fe-β-Ni(OH) <sub>2</sub> /NF                        | 1M KOH      | 10                       | 218            | 8         |
| NiMoS                                                 | 1M KOH      | 10                       | 260            | 9         |
| NiTe@RuO <sub>2</sub>                                 | 1M KOH      | 10                       | 274            | 10        |
| NiRu@C                                                | 1M KOH      | 10                       | 250            | 11        |
| Fe-Ni <sub>3</sub> S <sub>2</sub> @ FeNi <sub>3</sub> | 1M KOH      | 10                       | 213            | 12        |
| Co/N-CNT/VN                                           | 1M KOH      | 10                       | 240            | 13        |
| RuCo@CDs                                              | 1M KOH      | 10                       | 257            | 14        |
| Co <sub>4</sub> N-CeO <sub>2</sub> /GP                | 1M KOH      | 10                       | 239            | 15        |
| Rh SAC-CuO NAs/CF                                     | 1M KOH      | 10                       | 197            | 16        |
| Co <sub>5</sub> Mo <sub>10</sub> S <sub>x</sub> /CC   | 1M KOH      | 10                       | 153            | 17        |
| MP-MO <sub>x</sub>                                    | 1M KOH      | 10                       | 197            | 18        |
| Ir-NiCo LDH                                           | 1M KOH      | 10                       | 192            | 19        |

Table S4 Comparison of the overall water splitting performance of CeO<sub>x</sub>-NiB@NF and other electrocatalyst electrodes in 1.0 M KOH.

| Catalysts                                                                                                                | Electrolyte | j (mA·cm <sup>-2</sup> ) | Potential (V) | Reference |
|--------------------------------------------------------------------------------------------------------------------------|-------------|--------------------------|---------------|-----------|
| CeO <sub>x</sub> -NiB@NF   CeO <sub>x</sub> -NiB@NF                                                                      | 1M KOH      | 10                       | 1.424         | This work |
| Ni <sub>0.33</sub> Co <sub>0.67</sub> MoS <sub>4</sub> /CFC  Ni <sub>0.33</sub> Co <sub>0.67</sub> MoS <sub>4</sub> /CFC | 1M KOH      | 10                       | 1.55          | 20        |
| FeNi <sub>3</sub> -FeNi <sub>3</sub> N/NF   FeNi <sub>3</sub> -FeNi <sub>3</sub> N/NF                                    | 1M KOH      | 10                       | 1.5           | 21        |
| CoO/MoO <sub>x</sub>    CoO/MoO <sub>x</sub>                                                                             | 1M KOH      | 10                       | 1.53          | 22        |
| NiS <sub>2</sub> /MoS <sub>2</sub> -CC   NiS <sub>2</sub> /MoS <sub>2</sub> -CC                                          | 1M KOH      | 10                       | 1.605         | 23        |
| NiFeOH/CoS <sub>x</sub> /NF   NiFeOH/CoS <sub>x</sub> /NF                                                                | 1M KOH      | 10                       | 1.563         | 24        |
| MoS <sub>2</sub> /NiS <sub>2</sub>    MoS <sub>2</sub> /NiS <sub>2</sub>                                                 | 1M KOH      | 10                       | 1.59          | 25        |
| Ru <sub>1</sub> Co <sub>2</sub> NPs   Ru <sub>1</sub> Co <sub>2</sub> NPs                                                | 1M KOH      | 10                       | 1.59          | 26        |
| S-CoO <sub>x</sub>   S-CoO <sub>x</sub>                                                                                  | 1M KOH      | 10                       | 1.63          | 27        |
| Ni <sub>2</sub> P/Co <sub>2</sub> P   Ni <sub>2</sub> P/Co <sub>2</sub> P                                                | 1M KOH      | 10                       | 1.57          | 28        |
| RuNi-NCNFs  RuNi-NCNFs                                                                                                   | 1M KOH      | 10                       | 1.564         | 29        |
| Ni <sub>x</sub> Fe <sub>1-x</sub> B-2   Ni <sub>x</sub> Fe <sub>1-x</sub> B-2                                            | 1M KOH      | 10                       | 1.57          | 3         |

---

## References

1. T. Liang, Y. Liu, P. Zhang, C. Liu, F. Ma, Q. Yan and Z. Dai, *Chem. Eng. J.*, 2020, **395**, 124976.
2. H. Wang, X. Feng, M. Zhou, X. Bo and L. Guo, *ACS Appl. Nano Mater.*, 2020, **3**, 6336-6343.
3. W. Hong, S. Sun, Y. Kong, Y. Hu and G. Chen, *J. Mater. Chem. A*, 2020, **8**, 7360-7367.
4. N. Li, H. Tan, X. Ding, H. Duan, W. Hu, G. Li, Q. Ji, Y. Lu, Y. Wang, F. Hu, C. Wang, W. Cheng, Z. Sun and W. Yan, *Appl. Catal., B*, 2020, **266**, 118621.
5. J. H. Jeong, S. Kunwar, S. Pandit and J. Lee, *ACS Appl. Nano Mater.*, 2020, **3**, 6507-6515.
6. J. Guan, C. Li, J. Zhao, Y. Yang, W. Zhou, Y. Wang and G. Li, *Appl. Catal., B*, 2020, **269**, 118600.
7. H. Fan, W. Chen, G. Chen, J. Huang, C. Song, Y. Du, C. Li and K. Ostrikov, *Appl. Catal., B*, 2020, **268**, 118440.
8. X. Qiao, H. Kang, Y. Li, K. Cui, X. Jia, H. Liu, W. Qin, M. Pupucevski and G. Wu, *ACS Appl. Mater. Interfaces*, 2020, **12**, 36208-36219.
9. C. Wang, X. Shao, J. Pan, J. Hu and X. Xu, *Appl. Catal., B*, 2020, **268**, 118435.
10. H. Sun, J. Yang, J. Li, Z. Li, X. Ao, Y. Liu, Y. Zhang, Y. Li, C. Wang and J. Tang, *Appl. Catal., B*, 2020, **272**, 118988.
11. Q. Yang, P. Jin, B. Liu, L. Zhao, J. Cai, Z. Wei, S. Zuo, J. Zhang and L. Feng, *J. Mater. Chem. A*, 2020, **8**, 9049-9057.
12. W. Zhang, Q. Jia, H. Liang, L. Cui, D. Wei and J. Liu, *Chem. Eng. J.*, 2020, **396**, 125315.
13. C. Huang, D. Wu, P. Qin, K. Ding, C. Pi, Q. Ruan, H. Song, B. Gao, H. Chen and P. K. Chu, *Nano Energy*, 2020, **73**, 104788.
14. T. Feng, G. Yu, S. Tao, S. Zhu, R. Ku, R. Zhang, Q. Zeng, M. Yang, Y. Chen, W. Chen, W. Chen and B. Yang, *J. Mater. Chem. A*, 2020, **8**, 9638-9645.
15. H. Sun, C. Tian, G. Fan, J. Qi, Z. Liu, Z. Yan, F. Cheng, J. Chen, C. P. Li and M. Du, *Adv. Funct. Mater.*, 2020, **30**, 1910596.
16. H. Xu, T. Liu, S. Bai, L. Li, Y. Zhu, J. Wang, S. Yang, Y. Li, Q. Shao and X. Huang, *Nano Lett.*, 2020, **20**, 5482-5489.
17. Y. Lu, X. Guo, L. Yang, W. Yang, W. Sun, Y. Tuo, Y. Zhou, S. Wang, Y. Pan, W. Yan, D. Sun and Y. Liu, *Chem. Eng. J.*, 2020, **394**, 124849.
18. J. Deng, S. Chen, N. Yao, Q. Wang, J. Li and Z. Wei, *Appl. Catal., B*, 2020, **277**, 119175.
19. R. Fan, Q. Mu, Z. Wei, Y. Peng and M. Shen, *J. Mater. Chem. A*, 2020, **8**, 9871-9881.
20. L. Hang, T. Zhang, Y. Sun, D. Men, X. Lyu, Q. Zhang, W. Cai and Y. Li, *J. Mater. Chem. A*, 2018, **6**, 19555-19562.
21. S. Liang, M. Jing, T. Thomas, J. Liu, H. Guo, J. P. Attfield, A. Saad, H. Shen and M. Yang, *Sustainable Energy Fuels*, 2020, **4**, 6245-6250.
22. X. Yan, L. Tian, S. Atkins, Y. Liu, J. Murowchick and X. Chen, *ACS Sustainable Chem. Eng.*, 2016, **4**, 3743-3749.
23. X. Wang, L. Li, Z. Wang, L. Tan, Z. Wu, Z. Liu, S. Gai and P. Yang, *Electrochim. Acta*, 2019, **326**, 134983.
24. R. Bose, V. R. Jothi, K. Karuppasamy, A. Alfantazi and S. C. Yi, *J. Mater. Chem. A*, 2020, **8**, 13795-13805.
25. J. Lin, P. Wang, H. Wang, C. Li, X. Si, J. Qi, J. Cao, Z. Zhong, W. Fei and J. Feng, *Adv. Sci.*,

- 
- 2019, **6**, 1900246.
26. Y. Bao, J. Dai, J. Zhao, Y. Wu, C. Li, L. Ji, X. Zhang and F. Yang, *ACS Appl. Energy Mater.*, 2020, **3**, 1869-1874.
27. X. Yu, Z. Yu, X. Zhang, P. Li, B. Sun, X. Gao, K. Yan, H. Liu, Y. Duan, M. Gao, G. Wang and S. Yu, *Nano Energy*, 2020, **71**, 104652.
28. H. Liu, M. Jin, D. Zhan, J. Wang, X. Cai, Y. Qiu and L. Lai, *Appl. Catal., B*, 2020, **272**, 118951.
29. M. Li, H. Wang, W. Zhu, W. Li, C. Wang and X. Lu, *Adv. Sci.*, 2020, **7**, 1901833.
